# Supplementary material for: Tailored porous carbons enabled by persistent micelles with glassy cores
Source: Royal Society of Chemistry journal article supplement (doi:10.1039/d1ma00146a), 2021-01-01
Supplement: d1ma00146a2.pdf [file d1ma00146a2.pdf]

**As-made microtomed TEM wall measurements**

| <b>OS1-EtOH-0.85</b> | <b>OS1-EtOH-0.95</b> | <b>OS1-EtOH-1.00</b> | <b>OS1-EtOH-1.05</b> | <b>OS1-EtOH-1.10</b> | <b>OS1-EtOH-1.20</b> |
|----------------------|----------------------|----------------------|----------------------|----------------------|----------------------|
| 10.934               | 5.792                | 5.44                 | 7.284                | 18.165               | 10.851               |
| 9.286                | 10.16                | 6.622                | 11.8                 | 8.163                | 15.652               |
| 4.472                | 9.714                | 11.371               | 9.839                | 13.765               | 11.115               |
| 11.035               | 9.672                | 8.055                | 10.606               | 12.781               | 7.226                |
| 9.911                | 12.553               | 11.371               | 4.352                | 14.985               | 7.214                |
| 7.775                | 8.386                | 9.507                | 10.229               | 10.859               | 7.71                 |
| 8.138                | 7.673                | 10.768               | 9.722                | 13.077               | 9.459                |
| 6.667                | 9.453                | 8.999                | 7.228                | 13.077               | 10.851               |
| 8.028                | 6.827                | 14.852               | 8.081                | 9.19                 | 11.658               |
| 6.164                | 5.847                | 8.381                | 10.036               | 7.904                | 9.527                |
| 6.96                 | 6.839                | 10.21                | 10.536               | 8.636                | 12.117               |
| 10.75                | 6.839                | 7.478                | 9.035                | 14.46                | 10.305               |
| 9.428                | 5.637                | 10.576               | 7.273                | 10.749               | 12.47                |
| 8.055                | 8.042                | 10.21                | 9.222                | 9.216                | 9.561                |
| 8.246                | 7.24                 | 8.974                | 9.035                | 8.083                | 12.425               |
| 4.427                | 11.654               | 8.165                | 14.002               | 11.219               | 13.82                |
| 7.18                 | 9.639                | 10.188               | 10.125               | 8.468                | 10.543               |
| 8.11                 | 8.357                | 8.999                | 6.515                | 11.219               | 8.263                |
| 8.138                | 9.478                | 11.391               | 9.424                | 7.361                | 13.055               |
| 6.037                | 8.386                | 9.577                | 7.485                | 10.052               | 10.028               |
| 7.087                | 10.16                | 8.055                | 8.494                | 13.643               | 11.251               |
| 7.454                | 7.47                 | 7.358                | 11.78                | 12.003               | 11.903               |
| 8.692                | 11.812               | 11.213               | 11.028               | 8.792                | 12.031               |
| 7.775                | 9.546                | 13.176               | 9.116                | 8.755                | 10.695               |
| 8.11                 | 8.434                | 14.957               | 9.772                | 8.755                | 8.827                |
| 7.454                | 8.122                | 8.698                | 8.081                | 7.904                | 14.165               |
| 7.087                | 8.363                | 11.391               | 9.705                | 8.755                | 12.528               |
| 7.601                | 9.478                | 10.448               | 8.871                | 12.681               | 10.543               |
| 6.7                  | 7.503                | 10.786               | 6.881                | 10.41                | 13.233               |
| 7.775                | 8.872                | 11.909               | 8.33                 | 11.417               | 9.915                |
| 8.692                | 8.032                | 12.059               | 8.861                | 9.98                 | 11.63                |
| 8.894                | 8.002                | 8.566                | 11.828               | 8.083                | 15.365               |
| 5.379                | 8.917                | 9.507                | 9.222                | 10.263               | 12.13                |
| 7.454                | 6.037                | 9.098                | 9.839                | 10.387               | 15.236               |
| 8.11                 | 5.792                | 8.721                | 9.16                 | 10.539               | 11.54                |
| 9.843                | 6.273                | 8.381                | 9.302                | 9.819                | 12.547               |
| 8.246                | 7.798                | 7.388                | 8.181                | 10.107               | 11.651               |
| 5.963                | 10.04                | 10.723               | 9.035                | 9.746                | 9.653                |

|        |        |        |        |        |        |
|--------|--------|--------|--------|--------|--------|
| 9.262  | 8.032  | 5.745  | 9.604  | 10.686 | 15.252 |
| 8.667  | 11.423 | 8.055  | 10.575 | 5.812  | 16.838 |
| 6.799  | 7.641  | 11.701 | 7.803  | 6.664  | 12.031 |
| 8.769  | 8.472  | 12.334 | 9.372  | 11.822 | 9.087  |
| 8      | 11.159 | 8.789  | 8.59   | 10.012 | 7.956  |
| 6.325  | 8.669  | 7.478  | 9.432  | 8.142  | 10.421 |
| 6.7    | 8.002  | 9.098  | 8.241  | 9.589  | 10.253 |
| 5.33   | 6.235  | 9.239  | 8.408  | 8.412  | 7.369  |
| 7.454  | 6.538  | 9.647  | 11.428 | 9.489  | 8.502  |
| 5.667  | 8.651  | 8.165  | 8.121  | 11.27  | 16.853 |
| 5.518  | 6.827  | 8.461  | 7.228  | 8.083  | 9.14   |
| 7.157  | 9.376  | 9.647  | 8.861  | 10.786 | 7.71   |
| 5.897  | 7.105  | 6.167  | 6.627  | 7.5    | 9.227  |
| 5.27   | 8.279  | 7.11   | 10.629 | 7.197  | 8.568  |
| 8.117  | 8.386  | 7.235  | 9.604  | 8.719  | 13.006 |
| 5.088  | 5.97   | 6.167  | 11.57  | 8.468  | 11.278 |
| 8.975  | 9.617  | 7.627  | 9.467  | 9.589  | 10.903 |
| 6.936  | 8.002  | 6.887  | 7.623  | 7.627  | 8.899  |
| 6.616  | 9.546  | 7.11   | 9.222  | 9.614  | 9.899  |
| 6.574  | 7.631  | 8.721  | 6.388  | 8.764  | 6.425  |
| 7.311  | 8.082  | 9.317  | 9.714  | 12.684 | 10.02  |
| 6.289  | 8.538  | 7.11   | 7.373  | 6.094  | 12.236 |
| 6.146  | 7.15   | 11.072 | 7.248  | 9.033  | 9.357  |
| 5.426  | 5.388  | 11.853 | 8.824  | 9.033  | 8.502  |
| 7.491  | 7.641  | 7.204  | 6.881  | 7.197  | 8.417  |
| 8.069  | 9.105  | 7.11   | 8.091  | 8.971  | 15.631 |
| 6.146  | 7.911  | 7.487  | 7.284  | 9.581  | 8.899  |
| 6.7    | 7.24   | 7.388  | 8.741  | 7.197  | 10.218 |
| 7.491  | 6.827  | 6.31   | 8.081  | 5.674  | 9.087  |
| 7.803  | 8.279  | 7.627  | 7.845  | 7.574  | 8.106  |
| 8.485  | 6.273  | 6.689  | 7.772  | 10.539 | 9.253  |
| 8.028  | 7.405  | 9.098  | 9.089  | 7.873  | 7.71   |
| 8.014  | 5.93   | 7.627  | 12.308 | 13.555 | 10.14  |
| 7.601  | 7.237  | 9.739  | 12.305 | 6.437  | 12.553 |
| 7.601  | 7.543  | 8.924  | 9.536  | 8.599  | 10.581 |
| 7.803  | 7.405  | 6.622  | 13.03  | 7.462  | 12.925 |
| 10.167 | 9.087  | 7.358  | 13.042 | 10.778 | 14.484 |
| 8.353  | 10.422 | 7.204  | 7.228  | 10.379 | 10.052 |
| 7.211  | 4.49   | 6.281  | 8.722  | 8.083  | 10.281 |
| 8.353  | 7.24   | 9.098  | 9.035  | 8.755  | 8.754  |

|        |        |        |        |        |        |
|--------|--------|--------|--------|--------|--------|
| 8.138  | 7.405  | 7.388  | 9.864  | 8.599  | 13.377 |
| 9.545  | 5.221  | 8.696  | 9.082  | 12.624 | 10.822 |
| 9.545  | 7.373  | 8.566  | 11.255 | 12.478 | 11.23  |
| 8.246  | 6.539  | 6.689  | 6.725  | 10.232 | 11.865 |
| 5.497  | 7.014  | 6.689  | 9.458  | 10.574 | 12.533 |
| 7.454  | 7.972  | 9.46   | 9.302  | 8.534  | 6.814  |
| 7.601  | 10.04  | 9.46   | 12.642 | 12.899 | 10.695 |
| 8.769  | 6.623  | 6.821  | 8.741  | 10.896 | 12.815 |
| 6.667  | 9.674  | 10.723 | 8.889  | 12.036 | 12.084 |
| 8.692  | 7.24   | 6.31   | 8.824  | 14.377 | 13.803 |
| 8.433  | 8.072  | 8.999  | 8.171  | 10.859 | 10.266 |
| 5.963  | 8.808  | 8.381  | 13.413 | 14.293 | 11.71  |
| 10.349 | 6.872  | 9.46   | 9.772  | 10.749 | 12.655 |
| 9.333  | 8.368  | 7.568  | 11.724 | 8.819  | 9.14   |
| 8.353  | 9.453  | 9.098  | 13.03  | 11.625 | 9.227  |
| 8.944  | 5.462  | 8.137  | 10.909 | 10.63  | 11.21  |
| 8.353  | 8.593  | 10.576 | 10.606 | 11.494 | 11.477 |
| 10.414 | 6.839  | 7.388  | 9.437  | 11.788 | 11.278 |
| 7.542  | 11.028 | 10.576 | 13.327 | 10.012 | 9.752  |
| 9.357  | 7.62   | 8.274  | 9.578  | 8.864  | 10.822 |
| 7.454  | 7.911  | 6.588  | 10.675 | 8.971  | 11.119 |
| 7.364  | 8.122  | 6.622  | 11.028 | 11.639 | 13.104 |

**As-made microtomed pore measurements**

| <b>OS1-EtOH-0.85</b> | <b>OS1-EtOH-0.95</b> | <b>OS1-EtOH-1.00</b> | <b>OS1-EtOH-1.05</b> | <b>OS1-EtOH-1.10</b> | <b>OS1-EtOH-1.20</b> |
|----------------------|----------------------|----------------------|----------------------|----------------------|----------------------|
| 16.125               | 18.356               | 13.243               | 16.622               | 14.063               | 19.041               |
| 13.283               | 14.48                | 15.875               | 18.432               | 24.744               | 20.556               |
| 18.821               | 11.359               | 20.344               | 19.549               | 25.124               | 18.017               |
| 14.636               | 14.368               | 14.852               | 18.917               | 24.56                | 14.878               |
| 16.429               | 10.962               | 14.807               | 14.467               | 24.118               | 19.434               |
| 15.62                | 14.102               | 10.033               | 15.876               | 23.809               | 18.054               |
| 12.875               | 19.939               | 18.257               | 21.471               | 18.004               | 19.574               |
| 15.041               | 14.216               | 16.548               | 16.742               | 22.241               | 19.541               |
| 18.856               | 23.637               | 16.453               | 21.01                | 17.24                | 17.676               |
| 24.267               | 15.345               | 16.521               | 22.452               | 21.461               | 14.835               |
| 17.951               | 17.344               | 13.967               | 13.932               | 18.053               | 17.581               |
| 17.364               | 14.062               | 18.836               | 17.35                | 17.804               | 18.784               |
| 14                   | 15.309               | 19.536               | 12.758               | 15.747               | 20.846               |
| 14.341               | 16.004               | 21.373               | 14.707               | 18.42                | 17.676               |

|        |        |        |        |        |        |
|--------|--------|--------|--------|--------|--------|
| 13.33  | 19.046 | 15.268 | 15.721 | 19.832 | 12.451 |
| 16.055 | 15.261 | 20.993 | 18.994 | 20.655 | 16.608 |
| 18.571 | 15.989 | 14.852 | 13.732 | 21.461 | 22.448 |
| 17.537 | 15.203 | 17.054 | 18.182 | 14.886 | 15.713 |
| 18.209 | 19.777 | 14.47  | 12.013 | 23.607 | 16.491 |
| 15.463 | 18.893 | 14.852 | 17.892 | 20.048 | 17.845 |
| 18.962 | 21.739 | 20.747 | 19.195 | 18.196 | 17.401 |
| 16.111 | 21.342 | 14.362 | 24.253 | 15.554 | 18.253 |
| 22.676 | 25.504 | 25.179 | 14.551 | 14.417 | 19.717 |
| 22.49  | 17.068 | 15.023 | 12.361 | 21.757 | 19.717 |
| 17.499 | 22.612 | 19.888 | 10.872 | 21.053 | 16.231 |
| 16.707 | 17.602 | 22.235 | 10.991 | 22.116 | 20.663 |
| 15.202 | 20.324 | 18.848 | 15.085 | 19.467 | 18.765 |
| 22.755 | 15.204 | 14.063 | 18.432 | 19.916 | 19.405 |
| 14.621 | 17.911 | 15.032 | 14.055 | 18.464 | 16.838 |
| 16.429 | 20.884 | 19.052 | 13.455 | 18.512 | 19.239 |
| 16.856 | 17.825 | 24.247 | 21.292 | 18.641 | 14.628 |
| 17.651 | 17.789 | 17.391 | 13.042 | 18.641 | 17.924 |
| 20.45  | 15.24  | 22.634 | 20.079 | 15.056 | 20.362 |
| 16.234 | 16.93  | 16.762 | 22.578 | 16.641 | 21.667 |
| 18.774 | 15.266 | 22.435 | 12.86  | 20.113 | 18.319 |
| 18.012 | 15.842 | 14.362 | 16.162 | 20.048 | 18.389 |
| 16.221 | 19.284 | 22.235 | 11.028 | 15.47  | 14.853 |
| 18.021 | 15.663 | 16.922 | 18.056 | 15.406 | 16.853 |
| 19.516 | 18.88  | 27.105 | 13.431 | 16.275 | 14.781 |
| 21.499 | 19.695 | 16.178 | 15.922 | 18.268 | 15.262 |
| 20.177 | 21.912 | 20.377 | 13.761 | 19.196 | 17     |
| 16.028 | 18.57  | 14.852 | 16.805 | 15.614 | 17.676 |
| 13.4   | 21.57  | 23.065 | 14.188 | 19.501 | 15.362 |
| 15.549 | 21.59  | 15.787 | 17.782 | 18.641 | 20.476 |
| 20.1   | 17.302 | 19.444 | 16.227 | 14.776 | 15.652 |
| 18.95  | 25.665 | 12.279 | 20.06  | 17.385 | 17.653 |
| 20.71  | 17.25  | 21.258 | 14.746 | 16.275 | 18.714 |
| 13.92  | 23.623 | 18.011 | 16.994 | 13.403 | 16.477 |
| 18.111 | 18.037 | 20.95  | 18.8   | 16.693 | 21.376 |
| 20     | 16.772 | 12.799 | 16.492 | 17.517 | 15.972 |
| 19.379 | 15.709 | 20.779 | 21.747 | 19.718 | 16.374 |
| 21.302 | 18.63  | 15.616 | 16.287 | 18.482 | 15.061 |
| 19.09  | 13.819 | 21.415 | 21.2   | 13.86  | 18.253 |
| 18.667 | 14.062 | 12.621 | 21.169 | 17.832 | 18.786 |

|        |        |        |        |        |        |
|--------|--------|--------|--------|--------|--------|
| 18.774 | 17.765 | 20.519 | 20.093 | 15.062 | 22.229 |
| 22.959 | 11.108 | 17.443 | 17.778 | 18.358 | 19.831 |
| 17.499 | 17.911 | 25.811 | 20.238 | 14.417 | 17.893 |
| 16.138 | 21.3   | 14.11  | 22.314 | 15.722 | 17.042 |
| 18.306 | 15.123 | 15.032 | 21.149 | 19.501 | 19.305 |
| 19.437 | 21.129 | 21.613 | 18.4   | 16.032 | 13.869 |
| 19.333 | 18.112 | 16.922 | 17.741 | 20.113 | 16.122 |
| 22.49  | 16.382 | 12.279 | 18.8   | 17.684 | 19.28  |
| 17.385 | 18.824 | 13.79  | 19.208 | 17.887 | 17.581 |
| 22.071 | 24.06  | 20.66  | 11.724 | 20.388 | 21.971 |
| 18.962 | 16.559 | 13.176 | 14.506 | 17.004 | 12.882 |
| 22.804 | 16.661 | 19.259 | 11.828 | 21.115 | 12.925 |
| 25.889 | 18.544 | 14.957 | 19.432 | 16.215 | 15.667 |
| 16.11  | 21.627 | 21.613 | 16.287 | 16.479 | 19.786 |
| 17.951 | 16.544 | 16.081 | 21.072 | 19.584 | 15.957 |
| 14.981 | 20.58  | 19.582 | 16.267 | 18.997 | 18.319 |
| 17.088 | 20.26  | 17.179 | 18.625 | 16.197 | 10.851 |
| 13.679 | 18.316 | 19.809 | 16.96  | 17.177 | 17.708 |
| 20.055 | 12.611 | 19.154 | 21.322 | 16.614 | 17.388 |
| 16.879 | 10.962 | 19.809 | 16.447 | 16.693 | 17.567 |
| 21.705 | 19.613 | 9.876  | 21.657 | 16.369 | 20.319 |
| 16.65  | 16.704 | 14.957 | 15.332 | 17.758 | 19.656 |
| 21.407 | 19.87  | 16.165 | 21.01  | 15.908 | 16.433 |
| 15.902 | 16.129 | 18.549 | 15.438 | 14.655 | 19.422 |
| 16.492 | 20.964 | 13.79  | 21.169 | 13.181 | 17.089 |
| 18.209 | 24.313 | 15.558 | 16.626 | 13.86  | 18.358 |
| 14.907 | 18.121 | 15.032 | 21.414 | 17.31  | 21.408 |
| 12.733 | 18.391 | 19.502 | 17.393 | 14.597 | 19.305 |
| 12.944 | 15.662 | 16.776 | 18.159 | 17.758 | 20.876 |
| 20.71  | 20.164 | 21.373 | 13.339 | 17.329 | 17.461 |
| 14     | 13.259 | 14.67  | 16.922 | 15.772 | 17.749 |
| 17.448 | 19.879 | 17.145 | 16.506 | 16.693 | 23.08  |
| 17.563 | 16.772 | 16.512 | 22.045 | 14.579 | 17.005 |
| 15.463 | 19.584 | 22.114 | 19.545 | 12.333 | 23.319 |
| 16.68  | 19.079 | 13.544 | 22.226 | 18.16  | 23.25  |
| 21.357 | 22.832 | 16.722 | 15.917 | 21.006 | 25.679 |
| 12.944 | 18.268 | 18.28  | 18.387 | 15.278 | 16.724 |
| 16.028 | 12.082 | 19.037 | 11.57  | 17.081 | 20.737 |
| 17.295 | 18.944 | 15.032 | 18.925 | 13.573 | 12.547 |
| 17.938 | 11.563 | 18.011 | 19.208 | 18.903 | 15.667 |

|        |        |        |        |        |        |
|--------|--------|--------|--------|--------|--------|
| 19.889 | 16.82  | 17.054 | 16.287 | 19.501 | 13.999 |
| 19.788 | 14.05  | 20.464 | 14.348 | 22.337 | 18.125 |
| 13.4   | 17.381 | 16.722 | 18.146 | 15.127 | 16.354 |
| 17.036 | 12.214 | 15.253 | 19.029 | 18.086 | 17.009 |
| 19.698 | 15.745 | 15.899 | 19.097 | 15.213 | 20.088 |
| 15.391 | 10.511 | 17.054 | 19.436 | 17.358 | 17.717 |

**Carbonized Wall Measurements**

| <b>OS1-EtOH-0.75</b> | <b>OS1-EtOH-0.85</b> | <b>OS1-EtOH-0.90</b> | <b>OS1-EtOH-1.00</b> | <b>OS1-EtOH-1.15</b> | <b>OS1-EtOH-1.25</b> | <b>OS1-EtOH-1.30</b> |
|----------------------|----------------------|----------------------|----------------------|----------------------|----------------------|----------------------|
| 7.876                | 8.410                | 6.278                | 12.613               | 10.696               | 7.838                | 13.059               |
| 9.357                | 8.659                | 9.591                | 8.249                | 10.799               | 9.339                | 14.428               |
| 8.110                | 8.577                | 6.640                | 9.246                | 11.162               | 8.070                | 15.551               |
| 9.418                | 9.059                | 7.421                | 12.104               | 10.865               | 6.887                | 14.089               |
| 10.216               | 8.511                | 6.976                | 10.513               | 7.441                | 9.097                | 10.682               |
| 8.195                | 11.714               | 6.770                | 9.846                | 10.799               | 8.630                | 14.632               |
| 7.726                | 6.935                | 9.079                | 10.353               | 10.567               | 10.600               | 11.454               |
| 8.159                | 8.049                | 5.557                | 11.306               | 10.396               | 9.175                | 11.047               |
| 9.594                | 7.979                | 7.979                | 12.699               | 9.377                | 8.858                | 11.053               |
| 9.171                | 9.589                | 7.622                | 7.933                | 10.449               | 12.121               | 12.293               |
| 9.501                | 7.235                | 8.662                | 8.414                | 11.590               | 11.968               | 11.615               |
| 9.778                | 8.916                | 8.028                | 12.860               | 15.340               | 6.887                | 10.958               |
| 9.334                | 9.515                | 6.770                | 13.043               | 10.137               | 9.973                | 10.823               |
| 8.53                 | 8.527                | 8.378                | 12.799               | 12.715               | 11.569               | 13.393               |
| 6.942                | 9.151                | 10.786               | 7.219                | 12.558               | 10.771               | 9.036                |
| 8.998                | 12.129               | 12.001               | 12.140               | 9.471                | 8.989                | 9.950                |
| 8.584                | 10.598               | 8.453                | 9.142                | 8.014                | 10.838               | 10.469               |
| 8.855                | 9.470                | 8.630                | 10.717               | 9.983                | 9.877                | 8.521                |
| 9.418                | 10.162               | 10.171               | 7.757                | 12.685               | 9.339                | 8.099                |
| 9.235                | 10.966               | 7.989                | 10.381               | 10.696               | 11.034               | 11.443               |
| 10.338               | 9.779                | 8.593                | 11.306               | 8.346                | 8.612                | 11.969               |
| 8.549                | 10.914               | 6.098                | 7.858                | 8.678                | 8.387                | 10.254               |
| 9.152                | 10.652               | 9.641                | 7.933                | 8.056                | 11.199               | 10.542               |
| 9.162                | 7.907                | 10.092               | 10.286               | 11.186               | 7.647                | 9.147                |
| 9.788                | 9.779                | 9.457                | 8.746                | 9.883                | 11.780               | 11.180               |
| 8.732                | 9.707                | 8.593                | 10.541               | 9.673                | 11.617               | 8.020                |
| 8.584                | 8.326                | 7.705                | 9.966                | 9.928                | 11.234               | 7.635                |
| 9.418                | 9.515                | 9.106                | 8.802                | 9.083                | 10.194               | 8.925                |
| 9.988                | 9.043                | 10.171               | 8.177                | 12.209               | 10.532               | 10.091               |
| 8.444                | 7.979                | 8.416                | 12.329               | 11.122               | 11.234               | 7.089                |
| 8.267                | 11.617               | 9.457                | 8.924                | 12.558               | 10.742               | 9.227                |
| 8.171                | 9.043                | 10.168               | 9.407                | 12.646               | 9.097                | 9.474                |
| 7.608                | 10.770               | 9.057                | 10.643               | 11.260               | 8.463                | 10.303               |

|        |        |        |        |        |        |        |
|--------|--------|--------|--------|--------|--------|--------|
| 8.732  | 12.406 | 8.713  | 10.286 | 13.660 | 9.305  | 9.192  |
| 9.543  | 9.589  | 9.272  | 10.381 | 11.186 | 10.542 | 10.789 |
| 10.995 | 8.326  | 9.106  | 9.490  | 10.982 | 10.403 | 10.919 |
| 9.162  | 9.411  | 7.705  | 9.232  | 11.609 | 11.063 | 10.031 |
| 8.350  | 9.289  | 12.315 | 10.122 | 9.083  | 9.000  | 9.314  |
| 8.195  | 9.515  | 11.127 | 12.799 | 10.159 | 10.257 | 6.950  |
| 10.564 | 9.182  | 9.561  | 12.543 | 12.385 | 9.097  | 6.989  |
| 8.954  | 9.894  | 10.045 | 10.054 | 10.011 | 10.472 | 10.010 |
| 8.732  | 10.092 | 10.408 | 12.551 | 10.987 | 12.865 | 8.698  |
| 8.855  | 7.916  | 9.469  | 12.177 | 11.027 | 8.831  | 9.010  |
| 9.501  | 7.907  | 8.786  | 8.530  | 11.590 | 9.115  | 10.353 |
| 8.999  | 7.854  | 9.097  | 11.015 | 8.815  | 10.171 | 12.105 |
| 7.876  | 9.105  | 10.045 | 10.050 | 11.915 | 11.034 | 10.074 |
| 8.159  | 9.043  | 9.209  | 9.355  | 13.127 | 8.078  | 11.961 |
| 10.564 | 8.258  | 9.235  | 10.286 | 10.364 | 9.649  | 10.911 |
| 8.350  | 10.218 | 8.773  | 10.726 | 11.062 | 9.930  | 9.557  |
| 8.195  | 10.447 | 9.097  | 11.716 | 12.058 | 10.779 | 10.256 |
| 5.631  | 8.533  | 8.410  | 8.022  | 10.104 | 10.403 | 9.812  |
| 7.223  | 9.207  | 8.325  | 9.480  | 10.234 | 11.968 | 8.022  |
| 6.810  | 7.428  | 9.097  | 8.725  | 7.583  | 9.909  | 7.964  |
| 5.865  | 9.207  | 8.705  | 8.332  | 9.282  | 12.153 | 7.582  |
| 8.747  | 8.141  | 8.612  | 7.079  | 7.790  | 11.284 | 7.964  |
| 6.781  | 6.954  | 8.551  | 9.954  | 8.652  | 9.451  | 5.324  |
| 5.805  | 6.597  | 7.879  | 6.645  | 7.351  | 10.171 | 8.721  |
| 4.799  | 8.433  | 8.099  | 8.521  | 7.530  | 9.591  | 7.040  |
| 5.805  | 6.444  | 9.200  | 8.083  | 7.910  | 9.973  | 8.421  |
| 5.865  | 7.175  | 10.403 | 7.543  | 11.373 | 14.256 | 8.823  |
| 4.104  | 9.067  | 8.528  | 6.450  | 8.848  | 12.945 | 9.258  |
| 4.815  | 8.141  | 8.635  | 9.418  | 9.040  | 10.967 | 10.415 |
| 6.296  | 7.175  | 9.235  | 6.703  | 8.042  | 8.713  | 12.005 |
| 6.327  | 7.692  | 8.207  | 7.087  | 8.419  | 10.472 | 10.353 |
| 7.247  | 7.675  | 8.246  | 6.747  | 9.695  | 10.127 | 9.730  |
| 7.178  | 7.771  | 9.600  | 7.101  | 10.732 | 9.253  | 10.388 |
| 5.720  | 6.879  | 8.158  | 8.428  | 9.270  | 10.069 | 11.943 |
| 5.342  | 8.433  | 13.381 | 5.012  | 8.419  | 8.185  | 11.413 |
| 5.076  | 7.542  | 10.069 | 4.953  | 8.991  | 10.349 | 11.510 |
| 4.795  | 8.796  | 9.649  | 6.585  | 9.138  | 8.416  | 10.948 |
| 6.596  | 6.220  | 8.010  | 5.943  | 10.273 | 12.921 | 10.660 |
| 6.421  | 10.720 | 9.338  | 8.332  | 10.364 | 9.837  | 10.521 |
| 6.687  | 6.034  | 10.349 | 8.521  | 9.138  | 14.362 | 10.941 |
| 4.007  | 6.442  | 9.839  | 7.973  | 8.811  | 11.579 | 9.752  |
| 5.805  | 6.830  | 9.591  | 8.521  | 11.602 | 10.427 | 10.957 |
| 6.693  | 8.940  | 10.000 | 9.302  | 9.989  | 11.284 | 9.234  |
| 5.507  | 8.544  | 9.338  | 8.168  | 10.963 | 9.649  | 11.982 |

|       |        |       |       |        |        |        |
|-------|--------|-------|-------|--------|--------|--------|
| 6.055 | 9.791  | 9.647 | 9.249 | 10.862 | 8.018  | 11.723 |
| 4.977 | 7.692  | 6.160 | 7.265 | 11.623 | 11.486 | 10.000 |
| 6.347 | 6.754  | 5.657 | 9.302 | 8.346  | 7.979  | 13.205 |
| 8.331 | 8.433  | 6.000 | 7.327 | 8.339  | 14.150 | 9.968  |
| 6.788 | 9.067  | 6.657 | 7.986 | 8.391  | 10.092 | 11.694 |
| 8.331 | 9.615  | 7.527 | 6.747 | 6.828  | 9.715  | 11.734 |
| 8.082 | 8.828  | 7.642 | 8.144 | 12.100 | 9.608  | 9.721  |
| 7.929 | 9.615  | 7.248 | 7.143 | 8.379  | 10.100 | 11.394 |
| 6.422 | 9.082  | 8.229 | 6.703 | 8.219  | 10.801 | 9.903  |
| 8.747 | 8.297  | 8.400 | 8.168 | 8.484  | 10.171 | 10.731 |
| 7.692 | 10.147 | 6.800 | 9.470 | 9.983  | 9.649  | 11.294 |
| 9.207 | 5.235  | 7.077 | 7.078 | 9.053  | 11.861 | 8.458  |
| 6.683 | 7.155  | 7.600 | 7.849 | 6.730  | 8.786  | 9.367  |
| 6.444 | 6.830  | 8.000 | 8.463 | 8.588  | 8.352  | 12.935 |
| 8.550 | 5.796  | 8.551 | 7.849 | 8.812  | 8.050  | 11.275 |
| 5.891 | 4.800  | 8.210 | 8.601 | 8.129  | 7.642  | 10.256 |
| 6.894 | 7.155  | 8.089 | 8.144 | 8.041  | 8.050  | 9.347  |
| 8.071 | 7.051  | 8.438 | 8.859 | 6.656  | 9.600  | 10.911 |
| 5.568 | 5.669  | 7.122 | 8.144 | 9.412  | 8.588  | 8.900  |
| 7.765 | 6.467  | 8.809 | 6.919 | 8.710  | 8.246  | 12.358 |
| 8.207 | 6.220  | 7.889 | 8.870 | 6.852  | 6.882  | 9.660  |
| 7.765 | 5.491  | 8.040 | 7.211 | 9.465  | 7.611  | 11.826 |
| 7.542 | 6.333  | 7.211 | 8.240 | 9.412  | 6.849  | 13.247 |
|       | 9.434  |       |       |        | 7.749  |        |
|       | 5.541  |       |       |        | 10.121 |        |
|       | 6.425  |       |       |        | 7.925  |        |
|       | 10.140 |       |       |        | 10.636 |        |
|       | 6.347  |       |       |        | 9.816  |        |
|       | 8.116  |       |       |        | 8.411  |        |
|       | 7.102  |       |       |        | 9.231  |        |
|       | 9.007  |       |       |        | 10.636 |        |
|       | 6.825  |       |       |        | 9.502  |        |
|       | 6.105  |       |       |        | 9.237  |        |
|       | 7.455  |       |       |        | 11.783 |        |
|       | 5.836  |       |       |        | 9.686  |        |
|       | 6.475  |       |       |        | 10.427 |        |
|       | 7.488  |       |       |        | 9.675  |        |
|       | 8.455  |       |       |        | 6.347  |        |
|       | 4.810  |       |       |        | 12.125 |        |
|       | 5.696  |       |       |        | 10.816 |        |
|       | 6.919  |       |       |        | 9.867  |        |
|       | 5.780  |       |       |        | 12.404 |        |
|       | 8.016  |       |       |        | 10.678 |        |
|       | 5.217  |       |       |        | 11.571 |        |



|        |  |  |  |        |
|--------|--|--|--|--------|
| 7.019  |  |  |  | 10.816 |
| 10.421 |  |  |  | 8.145  |
| 6.337  |  |  |  | 10.256 |
| 5.133  |  |  |  | 7.814  |
| 7.369  |  |  |  | 10.320 |
| 8.962  |  |  |  | 10.883 |
| 7.170  |  |  |  | 11.628 |
| 5.226  |  |  |  | 9.025  |
| 7.968  |  |  |  | 9.025  |
| 7.905  |  |  |  | 9.308  |
| 7.259  |  |  |  | 11.590 |
| 5.958  |  |  |  | 6.719  |
| 7.390  |  |  |  | 11.044 |
| 9.218  |  |  |  | 8.516  |
| 7.214  |  |  |  | 11.044 |
| 7.626  |  |  |  | 8.915  |
| 8.962  |  |  |  | 13.029 |
| 6.413  |  |  |  | 14.193 |
| 8.417  |  |  |  | 13.969 |
| 7.530  |  |  |  | 9.867  |
| 7.875  |  |  |  | 10.822 |
| 8.263  |  |  |  | 12.961 |
| 8.799  |  |  |  | 10.553 |
| 7.782  |  |  |  | 11.242 |
| 7.136  |  |  |  | 8.411  |
| 9.007  |  |  |  | 10.261 |
| 8.502  |  |  |  | 9.589  |
| 5.780  |  |  |  | 9.025  |
| 8.253  |  |  |  | 9.867  |
| 9.140  |  |  |  | 8.769  |
| 7.369  |  |  |  | 10.558 |
| 6.274  |  |  |  | 7.178  |
| 9.858  |  |  |  | 11.281 |
| 9.752  |  |  |  | 7.466  |
| 6.337  |  |  |  | 10.231 |
| 7.358  |  |  |  | 9.455  |
| 7.390  |  |  |  | 9.861  |
| 6.802  |  |  |  | 8.846  |
| 7.615  |  |  |  | 8.509  |
| 8.671  |  |  |  | 11.746 |
| 7.782  |  |  |  | 11.581 |
| 7.102  |  |  |  | 10.652 |
| 10.612 |  |  |  | 8.721  |
| 10.903 |  |  |  | 9.356  |

|  |        |  |  |  |        |  |
|--|--------|--|--|--|--------|--|
|  | 8.455  |  |  |  | 10.714 |  |
|  | 7.358  |  |  |  | 9.878  |  |
|  | 5.347  |  |  |  | 14.266 |  |
|  | 8.426  |  |  |  | 7.756  |  |
|  | 6.235  |  |  |  | 12.733 |  |
|  | 9.956  |  |  |  | 10.636 |  |
|  | 6.425  |  |  |  | 10.506 |  |
|  | 9.915  |  |  |  | 8.695  |  |
|  | 9.858  |  |  |  | 8.695  |  |
|  | 8.263  |  |  |  | 8.365  |  |
|  | 7.530  |  |  |  | 10.055 |  |
|  | 7.782  |  |  |  | 7.172  |  |
|  | 7.605  |  |  |  | 10.760 |  |
|  | 6.814  |  |  |  | 9.675  |  |
|  | 8.426  |  |  |  | 10.315 |  |
|  | 7.358  |  |  |  | 8.205  |  |
|  | 6.105  |  |  |  | 9.675  |  |
|  | 7.091  |  |  |  | 7.187  |  |
|  | 6.261  |  |  |  | 10.714 |  |
|  | 10.147 |  |  |  | 9.635  |  |
|  | 7.091  |  |  |  | 12.957 |  |
|  | 5.210  |  |  |  | 10.156 |  |
|  | 7.314  |  |  |  | 10.714 |  |
|  | 7.000  |  |  |  | 9.025  |  |
|  | 7.011  |  |  |  | 11.516 |  |
|  | 5.210  |  |  |  | 8.644  |  |
|  | 8.455  |  |  |  | 6.451  |  |
|  | 6.012  |  |  |  | 6.913  |  |
|  | 7.782  |  |  |  | 10.055 |  |
|  | 7.782  |  |  |  | 13.491 |  |
|  | 7.390  |  |  |  | 11.647 |  |
|  | 6.681  |  |  |  | 9.326  |  |
|  | 7.358  |  |  |  | 9.165  |  |
|  | 10.273 |  |  |  | 11.872 |  |
|  | 6.825  |  |  |  |        |  |

**Carbonized Pore Size Measurements**

| <b>OS1-EtOH-0.75</b> | <b>OS1-EtOH-0.85</b> | <b>OS1-EtOH-0.90</b> | <b>OS1-EtOH-1.00</b> | <b>OS1-EtOH-1.15</b> | <b>OS1-EtOH-1.25</b> | <b>OS1-EtOH-1.30</b> |
|----------------------|----------------------|----------------------|----------------------|----------------------|----------------------|----------------------|
| 10.661               | 11.565               | 9.588                | 10.699               | 9.410                | 9.049                | 9.300                |
| 11.120               | 13.068               | 11.545               | 9.594                | 10.171               | 9.292                | 11.309               |
| 10.652               | 13.138               | 11.036               | 8.034                | 8.387                | 10.566               | 8.754                |
| 10.438               | 11.074               | 13.041               | 8.361                | 8.453                | 10.117               | 11.907               |
| 9.142                | 10.756               | 10.932               | 11.624               | 8.566                | 11.280               | 9.877                |

|        |        |        |        |        |        |        |
|--------|--------|--------|--------|--------|--------|--------|
| 9.355  | 10.406 | 11.119 | 12.283 | 7.103  | 9.049  | 8.271  |
| 13.769 | 10.204 | 10.932 | 11.381 | 9.657  | 9.161  | 6.311  |
| 11.005 | 8.192  | 10.590 | 9.321  | 8.965  | 10.368 | 8.900  |
| 10.438 | 11.219 | 11.119 | 11.624 | 11.234 | 9.230  | 8.565  |
| 9.142  | 10.884 | 10.192 | 8.813  | 10.380 | 9.557  | 11.564 |
| 10.680 | 11.585 | 9.707  | 9.544  | 10.540 | 8.703  | 11.065 |
| 11.833 | 9.740  | 10.707 | 9.029  | 9.097  | 11.182 | 9.606  |
| 13.304 | 10.884 | 10.612 | 9.192  | 9.715  | 11.671 | 9.458  |
| 11.122 | 8.524  | 10.079 | 10.714 | 9.390  | 11.892 | 10.312 |
| 11.666 | 9.548  | 10.326 | 10.389 | 9.780  | 11.161 | 10.541 |
| 11.982 | 9.524  | 10.239 | 9.463  | 9.877  | 9.557  | 12.802 |
| 9.499  | 10.990 | 13.361 | 7.487  | 10.266 | 10.722 | 11.166 |
| 10.054 | 10.204 | 9.158  | 11.862 | 13.381 | 11.718 | 15.073 |
| 10.680 | 9.620  | 9.478  | 11.989 | 9.000  | 12.257 | 10.288 |
| 9.965  | 12.414 | 8.844  | 10.879 | 8.777  | 10.368 | 13.473 |
| 11.708 | 12.245 | 10.239 | 11.938 | 10.645 | 10.348 | 8.861  |
| 11.227 | 10.969 | 8.844  | 12.156 | 11.597 | 12.530 | 7.089  |
| 11.122 | 10.294 | 13.308 | 11.710 | 10.380 | 12.341 | 10.553 |
| 10.726 | 12.507 | 9.714  | 9.975  | 7.647  | 11.224 | 10.445 |
| 10.343 | 11.644 | 11.245 | 9.637  | 10.257 | 10.108 | 8.271  |
| 11.504 | 11.074 | 11.258 | 12.379 | 10.835 | 11.556 | 11.130 |
| 9.846  | 13.637 | 11.039 | 7.980  | 14.480 | 10.482 | 11.387 |
| 10.573 | 9.668  | 13.029 | 11.042 | 12.611 | 10.700 | 9.408  |
| 10.122 | 11.605 | 12.847 | 10.160 | 11.920 | 10.395 | 8.686  |
| 9.685  | 11.219 | 13.340 | 8.301  | 10.603 | 11.125 | 8.772  |
| 10.548 | 11.637 | 9.166  | 9.668  | 13.075 | 11.249 | 11.264 |
| 11.350 | 12.350 | 12.211 | 11.440 | 15.944 | 10.395 | 9.629  |
| 12.008 | 11.585 | 9.579  | 12.059 | 10.843 | 9.765  | 10.239 |
| 10.040 | 12.544 | 8.717  | 9.101  | 8.623  | 10.595 | 9.438  |
| 9.672  | 10.208 | 9.013  | 10.039 | 15.621 | 11.748 | 8.554  |
| 11.933 | 9.615  | 9.653  | 12.846 | 8.669  | 11.538 | 9.023  |
| 12.712 | 12.587 | 10.776 | 11.960 | 13.302 | 8.486  | 8.829  |
| 11.873 | 12.677 | 13.767 | 8.416  | 10.442 | 8.796  | 10.016 |
| 10.000 | 10.995 | 12.211 | 8.793  | 10.823 | 9.314  | 9.877  |
| 9.666  | 10.245 | 12.645 | 9.715  | 13.075 | 9.904  | 10.797 |
| 8.809  | 11.745 | 11.347 | 7.837  | 10.806 | 9.338  | 9.803  |
| 8.246  | 11.771 | 12.081 | 10.987 | 13.350 | 11.384 | 7.993  |
| 9.338  | 8.600  | 10.160 | 9.089  | 13.023 | 8.800  | 8.925  |
| 9.983  | 9.176  | 9.521  | 10.227 | 13.155 | 10.675 | 9.202  |
| 11.517 | 12.092 | 9.351  | 9.601  | 10.473 | 10.500 | 12.242 |
| 11.454 | 11.488 | 10.268 | 12.877 | 11.981 | 10.807 | 9.674  |
| 11.967 | 12.313 | 8.844  | 10.379 | 9.943  | 9.024  | 10.541 |
| 9.683  | 8.828  | 8.858  | 11.389 | 14.380 | 11.034 | 12.683 |
| 11.314 | 10.786 | 9.410  | 10.787 | 9.655  | 9.058  | 7.022  |

|         |        |        |        |        |        |        |
|---------|--------|--------|--------|--------|--------|--------|
| 10.918  | 11.926 | 9.341  | 12.545 | 13.368 | 10.127 | 12.779 |
| 10.400  | 9.541  | 11.028 | 10.566 | 9.943  | 12.166 | 9.243  |
| 9.338   | 9.834  | 7.637  | 10.958 | 12.058 | 12.806 | 11.323 |
| 11.545  | 9.659  | 9.655  | 11.206 | 11.494 | 10.736 | 11.907 |
| 8.653   | 10.300 | 12.579 | 13.028 | 11.071 | 9.675  | 12.882 |
| 8.736   | 9.176  | 10.962 | 11.903 | 9.673  | 11.377 | 12.683 |
| 8.898   | 11.251 | 8.538  | 12.877 | 10.983 | 10.469 | 9.981  |
| 10.032  | 10.943 | 12.964 | 11.074 | 9.138  | 11.182 | 11.532 |
| 9.675   | 10.189 | 11.187 | 9.313  | 11.652 | 10.748 | 13.739 |
| 10.127  | 12.667 | 13.470 | 14.078 | 12.385 | 10.024 | 11.683 |
| 10.5600 | 10.355 | 10.814 | 13.373 | 12.317 | 9.879  | 11.521 |
| 11.0650 | 8.682  | 12.082 | 11.500 | 12.491 | 14.142 | 11.053 |
| 11.8590 | 10.627 | 9.919  | 12.899 | 12.054 | 10.483 | 11.364 |
| 10.3760 | 8.682  | 9.025  | 12.050 | 9.989  | 13.200 | 11.683 |
| 10.1820 | 9.330  | 10.843 | 10.668 | 11.794 | 12.528 | 9.123  |
| 10.1210 | 11.842 | 12.064 | 12.050 | 10.901 | 11.600 | 10.577 |
| 11.7710 | 10.586 | 9.655  | 11.364 | 10.444 | 10.560 | 11.610 |
| 12.8810 | 9.451  | 10.426 | 11.919 | 11.107 | 9.806  | 9.752  |
| 10.3040 | 9.651  | 11.818 | 12.252 | 10.444 | 8.854  | 12.792 |
| 11.7340 | 10.259 | 13.308 | 10.370 | 10.338 | 10.560 | 10.565 |
| 10.4990 | 12.313 | 10.325 | 12.163 | 15.000 | 10.628 | 12.098 |
| 10.7320 | 10.245 | 11.430 | 10.501 | 9.789  | 13.103 | 11.129 |
| 12.5160 | 9.791  | 11.729 | 11.624 | 11.319 | 9.541  | 9.527  |
| 10.4080 | 11.251 | 11.245 | 12.915 | 10.901 | 8.050  | 9.040  |
| 10.0000 | 13.025 | 10.814 | 11.215 | 11.623 | 13.624 | 11.378 |
| 13.3630 | 12.278 | 13.247 | 11.526 | 8.960  | 10.633 | 8.221  |
| 10.5640 | 12.185 | 11.359 | 11.703 | 9.972  | 11.321 | 11.342 |
| 8.8540  | 11.213 | 13.831 | 12.607 | 11.314 | 11.841 | 11.950 |
| 9.8790  | 9.082  | 11.817 | 12.529 | 10.273 | 11.321 | 14.270 |
| 9.4400  | 9.176  | 11.757 | 10.188 | 11.980 | 9.879  | 11.790 |
| 10.8640 | 9.615  | 14.193 | 10.668 | 12.646 | 11.229 | 8.403  |
| 11.1140 | 10.515 |        | 9.954  | 12.054 | 9.130  | 13.035 |
| 10.2220 | 9.514  |        | 11.215 | 10.137 | 10.400 | 11.739 |
| 10.6280 | 10.667 |        | 12.529 | 11.226 | 8.089  | 11.521 |
| 10.0720 | 10.147 |        | 10.341 | 12.175 | 8.898  | 9.408  |
| 10.9030 | 10.733 |        | 8.696  | 12.145 | 10.024 | 10.529 |
| 11.6220 | 11.200 |        | 9.480  | 9.371  | 9.765  | 10.006 |
| 13.0200 | 8.533  |        | 11.180 | 9.605  | 12.060 | 12.938 |
| 10.9820 | 10.355 |        | 11.389 | 11.625 | 13.279 | 10.844 |
| 11.1410 | 8.876  |        | 10.101 | 12.026 | 10.197 | 12.860 |
| 11.2590 | 8.940  |        | 11.517 | 11.011 | 10.469 | 10.601 |
| 13.3440 | 9.082  |        | 11.407 | 7.611  | 10.591 | 10.707 |
| 10.6670 | 10.487 |        | 11.551 | 8.379  | 10.182 | 10.334 |
| 10.4510 | 11.648 |        | 9.785  | 11.022 | 10.024 | 10.663 |

|         |        |  |        |        |        |        |
|---------|--------|--|--------|--------|--------|--------|
| 0.3550  | 11.314 |  | 10.189 | 8.399  | 8.845  | 9.550  |
| 10.7330 | 9.615  |  | 12.091 | 12.022 | 11.000 | 9.551  |
| 1.3550  | 10.667 |  | 10.859 | 12.663 | 15.232 | 12.383 |
| 10.4630 | 9.541  |  | 9.386  | 8.049  | 10.198 | 11.691 |
| 9.5410  | 11.488 |  | 11.215 | 6.966  | 10.770 | 10.091 |
| 11.6480 | 10.982 |  | 8.958  | 10.273 | 8.504  | 10.303 |
| 10.5860 | 11.215 |  | 9.835  | 7.854  | 9.372  | 13.340 |
|         | 13.275 |  |        |        | 11.746 |        |
|         | 12.024 |  |        |        | 9.038  |        |
|         | 9.277  |  |        |        | 9.861  |        |
|         | 9.636  |  |        |        | 10.574 |        |
|         | 12.084 |  |        |        | 8.865  |        |
|         | 15.066 |  |        |        | 10.760 |        |
|         | 11.521 |  |        |        | 6.390  |        |
|         | 10.116 |  |        |        | 13.164 |        |
|         | 10.471 |  |        |        | 10.928 |        |
|         | 12.190 |  |        |        | 14.561 |        |
|         | 8.568  |  |        |        | 9.675  |        |
|         | 11.180 |  |        |        | 10.336 |        |
|         | 8.872  |  |        |        | 13.491 |        |
|         | 13.627 |  |        |        | 8.291  |        |
|         | 11.484 |  |        |        | 11.044 |        |
|         | 7.562  |  |        |        | 8.739  |        |
|         | 8.439  |  |        |        | 11.315 |        |
|         | 7.358  |  |        |        | 13.698 |        |
|         | 9.923  |  |        |        | 8.326  |        |
|         | 10.589 |  |        |        | 7.897  |        |
|         | 8.263  |  |        |        | 8.976  |        |
|         | 9.227  |  |        |        | 10.379 |        |
|         | 10.421 |  |        |        | 11.741 |        |
|         | 9.628  |  |        |        | 10.714 |        |
|         | 8.417  |  |        |        | 10.304 |        |
|         | 10.273 |  |        |        | 9.308  |        |
|         | 10.242 |  |        |        | 11.633 |        |
|         | 11.627 |  |        |        | 10.427 |        |
|         | 8.818  |  |        |        | 8.385  |        |
|         | 9.653  |  |        |        | 9.911  |        |
|         | 10.695 |  |        |        | 13.422 |        |
|         | 10.521 |  |        |        | 9.972  |        |
|         | 11.068 |  |        |        | 8.769  |        |
|         | 8.106  |  |        |        | 11.104 |        |
|         | 8.872  |  |        |        | 13.364 |        |
|         | 8.899  |  |        |        | 12.824 |        |
|         | 11.623 |  |        |        | 11.242 |        |

10.490  
7.091  
13.627  
15.962  
10.581  
17.581  
9.561  
19.570  
9.899  
8.224  
8.799  
13.562  
9.253  
10.405  
8.634  
9.087  
12.470  
8.854  
10.266  
13.037  
9.923  
12.757  
11.651  
8.016  
12.647  
9.657  
8.263  
7.956  
8.263  
8.962  
10.623  
10.218  
11.917  
7.544  
9.689  
8.426  
11.057  
9.923  
10.020  
10.484  
9.357  
8.606  
11.068  
9.322

12.629  
9.589  
13.392  
9.356  
10.234  
10.595  
13.878  
11.928  
9.686  
11.979  
11.276  
13.573  
11.168  
16.611  
12.506  
13.862  
9.586  
7.133  
9.686  
7.466  
7.777  
9.657  
11.628  
9.972  
9.379  
10.191  
9.068  
13.088  
9.657  
8.509  
10.698  
8.332  
7.749

|        |  |  |  |  |  |
|--------|--|--|--|--|--|
| 10.092 |  |  |  |  |  |
| 8.642  |  |  |  |  |  |
| 8.578  |  |  |  |  |  |
| 8.799  |  |  |  |  |  |
| 10.323 |  |  |  |  |  |
| 7.455  |  |  |  |  |  |
| 8.606  |  |  |  |  |  |
| 11.143 |  |  |  |  |  |
| 11.451 |  |  |  |  |  |
| 8.340  |  |  |  |  |  |
| 10.323 |  |  |  |  |  |
| 9.357  |  |  |  |  |  |
| 7.785  |  |  |  |  |  |
| 10.581 |  |  |  |  |  |
| 8.502  |  |  |  |  |  |
| 11.028 |  |  |  |  |  |
| 9.227  |  |  |  |  |  |
| 8.568  |  |  |  |  |  |
| 8.818  |  |  |  |  |  |
